# Supplementary material for: Nontrivial topology and topological phase transition in two-dimensional monolayer Tl
Source: Royal Society of Chemistry journal article supplement (doi:10.1039/c8cp02649a), 2018-01-01
Supplement: c8cp02649a1.pdf [file c8cp02649a1.pdf]

## Supporting information

### Nontrivial Topology and Topological Phase Transition in Two-Dimensional Monolayer Tl

*Jin Zhang, Wei-xiao Ji, Chang-wen Zhang, \* Ping Li, and Pei-ji Wang*  
School of Physics and Technology, University of Jinan, Jinan, Shandong, 250022,  
People's Republic of China

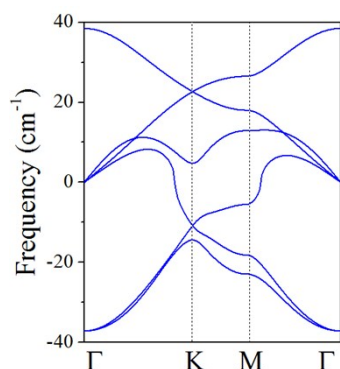

**Fig. S1** Calculated phonon spectrum of *h*-Tl monolayer. Note that a large soft mode frequency appears at the  $\Gamma$  point, indicating it is dynamic unstable.

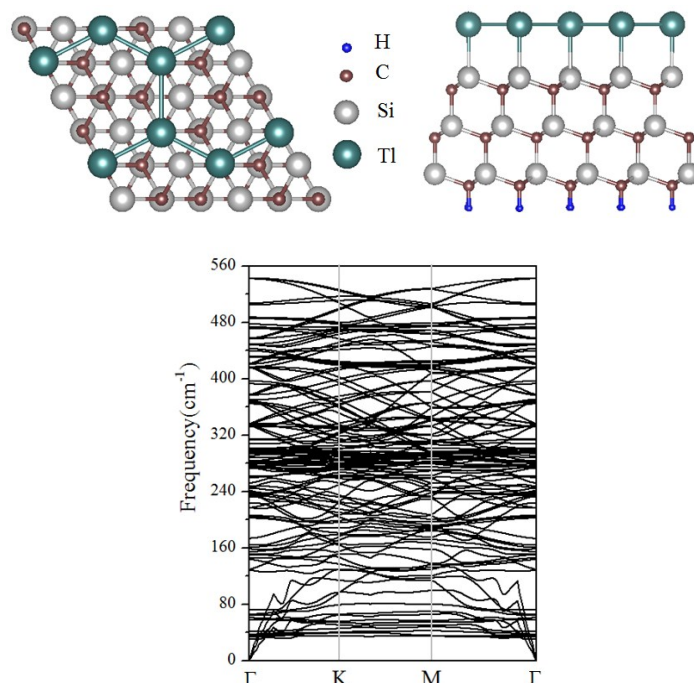

**Fig. S2** Model of monolayer *h*-Tl placed on the threefold-symmetric SiC(0001) substrate in ( $\sqrt{3} \times \sqrt{3}$ ) commensurate registry. As expected, the soft mode frequency is removed due to the effect of SiC substrate. Experimentally, by using a well-controlled fabrication method such as molecular beam epitaxy (MBE), a periodic monolayer Tl has been grown on a Si (111) [1, 2] and Ge (111) [3]

substrates. Obviously, the investigation on free-standing  $h$ -TI provides an interesting platform to well explore TI-based 2D materials.

**References:**

- [1] J. Ibanez-Azpiroz, A. Eiguren, and A. Bergara, Phys. Rev. B, 84, 125435 (2011).
- [2] S. D. Stolwijk, A. B. Schmidt, M. Donath, K. Sakamoto and P. Kruger, Phys. Rev. Lett., 111, 176402 (2013).
- [3] P. Eickholt, P. Kruger, S. D. Stolwijk, A. B. Schmidt and M. Donath, Phys. Rev. B, 93, 085412 (2016).
